# Supplementary material for: Western diet induces a shift in microbiota composition enhancing susceptibility to Adherent-Invasive E. coli infection and intestinal inflammation
Source: PubMed Central journal article supplement (PMC4705701; doi:10.1038/srep19032), 2016-01-08
Supplement: srep19032-s1.pdf [file srep19032-s1.pdf]

## Supplementary Information

**Western diet induces a shift in microbiota composition enhancing susceptibility to Adherent-Invasive *E. coli* infection and intestinal inflammation.**

**Allison Agus<sup>1</sup>, Jérémy Denizot<sup>1</sup>, Jonathan Thévenot<sup>1,2</sup>, Margarita Martinez-Medina<sup>1</sup>, Sébastien Massier<sup>1</sup>, Pierre Sauvanet<sup>1,3</sup>, Annick Bernalier-Donadille<sup>4</sup>, Sylvain Denis<sup>2</sup>, Paul Hofman<sup>5</sup>, Richard Bonnet<sup>1,6</sup>, Elisabeth Billard<sup>1,7</sup>, Nicolas Barnich<sup>1,7\*</sup>**

<sup>1</sup>*Clermont Université, M2iSH, UMR 1071 INSERM/Université d'Auvergne, Clermont-Ferrand, France Unité Sous Contrat 2018 Institut National de la Recherche Agronomique, Clermont-Ferrand, France*; <sup>2</sup>*Clermont Université, Université d'Auvergne, Centre de Recherche en Nutrition Humaine Auvergne, EA 4678 CIDAM, Conception Ingénierie et Développement de l'Aliment et du Médicament, Clermont-Ferrand, France*; <sup>3</sup>*Digestive Surgery Department, Centre Hospitalier Universitaire, Clermont-Ferrand 63000, France*; <sup>4</sup>*UR454 Microbiology Division, INRA, Research Centre of Clermont-Ferrand-Theix, 63122 Saint Genès-Champanelle, France*; <sup>5</sup>*Laboratory of Clinical and Experimental Pathology and Hospital-Related Biobank (BB 0033-00025), Pasteur Hospital, and IRCAN CNRS UMR 7284, Inserm U1081, Nice Sophia Antipolis University, France*; <sup>6</sup>*Bacteriology Department, Centre Hospitalier Universitaire, Clermont-Ferrand 63000, France*, <sup>7</sup>*Institut Universitaire de Technologie, Génie Biologique, Aubière, France.*

**A**

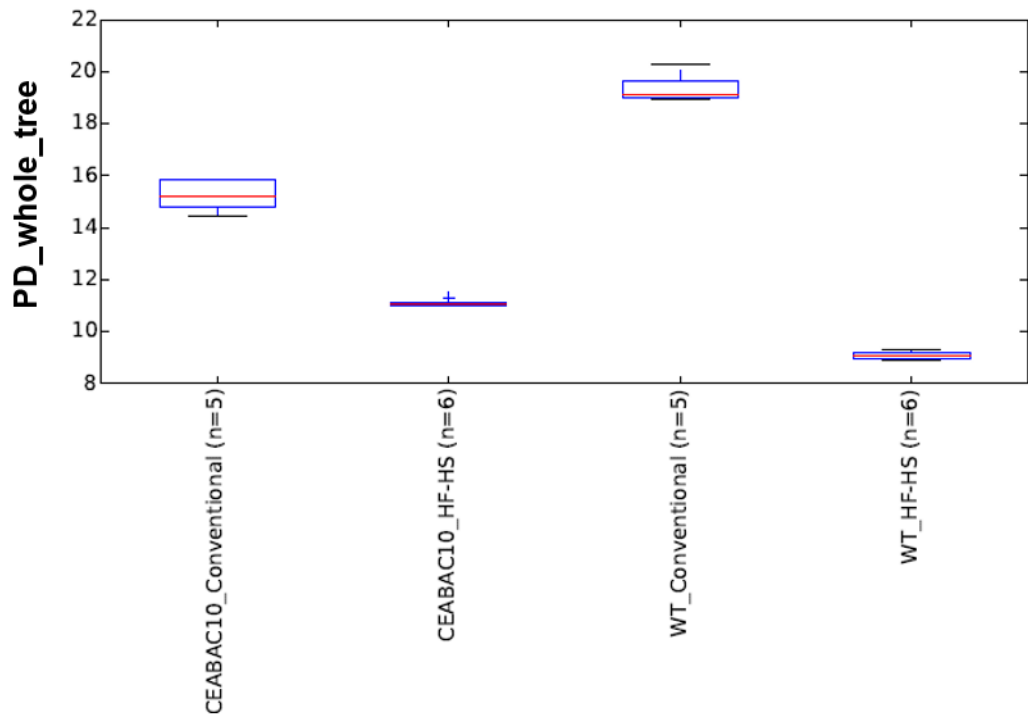

**B**

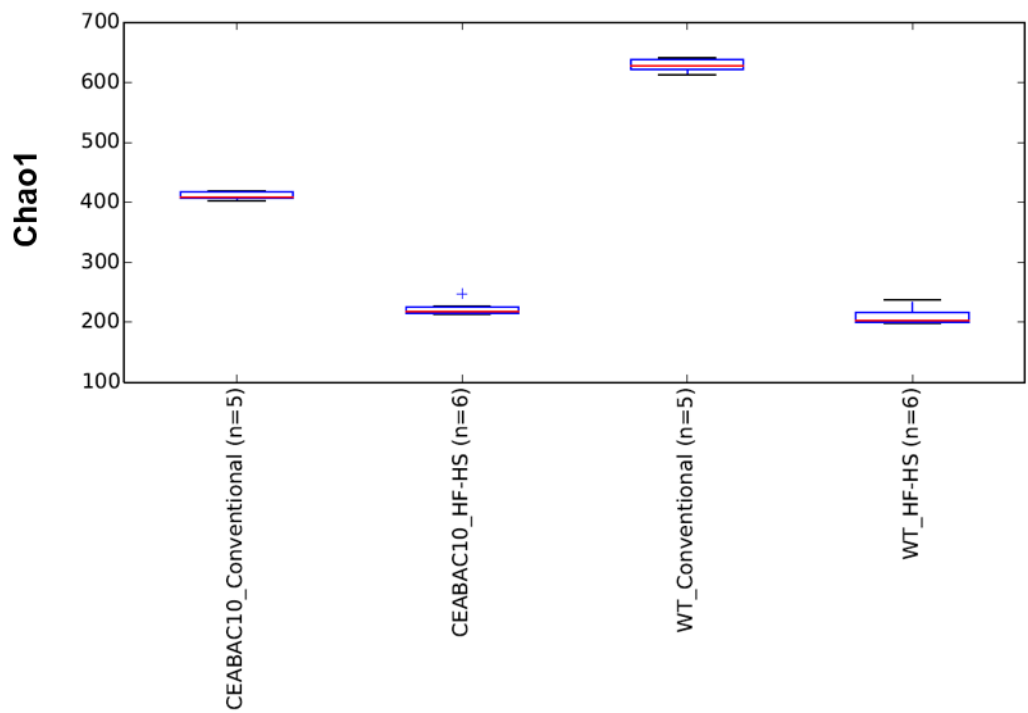

**Figure S1: (A) Microbiota alpha diversity measured by the phylogenetic distance and (B) the expected richness.**
